# Supplementary material for: Tunable surface wettability and pH-responsive 2D structures from amphiphilic and amphoteric protein microfibrils
Source: Royal Society of Chemistry journal article supplement (doi:10.1039/d0ra05067a), 2020-01-01
Supplement: d0ra05067a1.pdf [file d0ra05067a1.pdf]

### Supplemental Information

## Tunable surface wettability and pH-responsive 2D structures from amphiphilic and amphoteric protein microfibrils

Xingchen Liu and You-Lo Hsieh

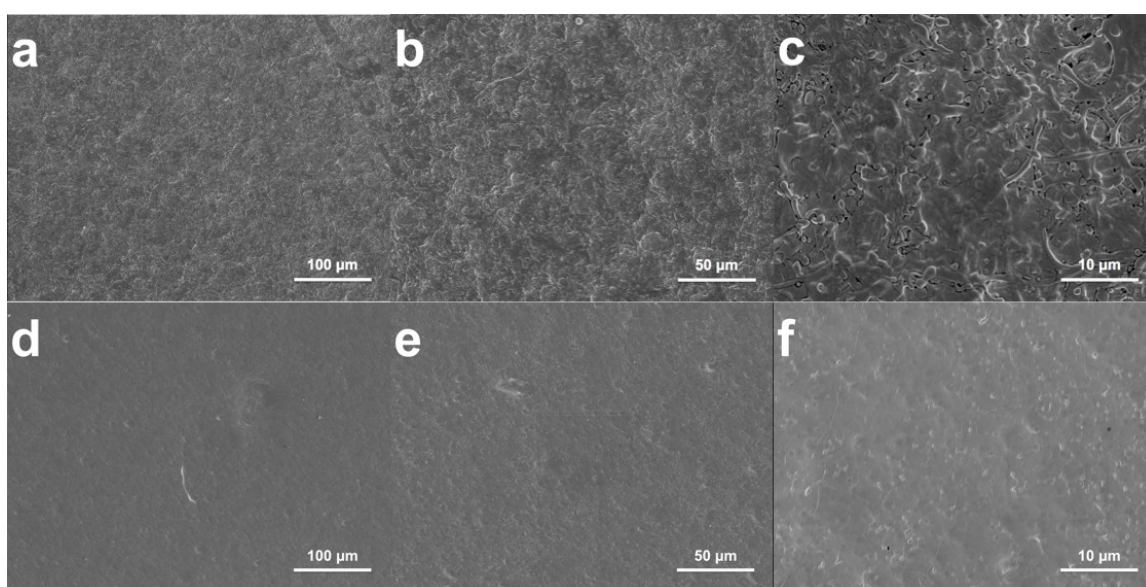

Figure S1. SEM images of film #1 (21 °C): a-c. top surface; d-f. bottom surface.

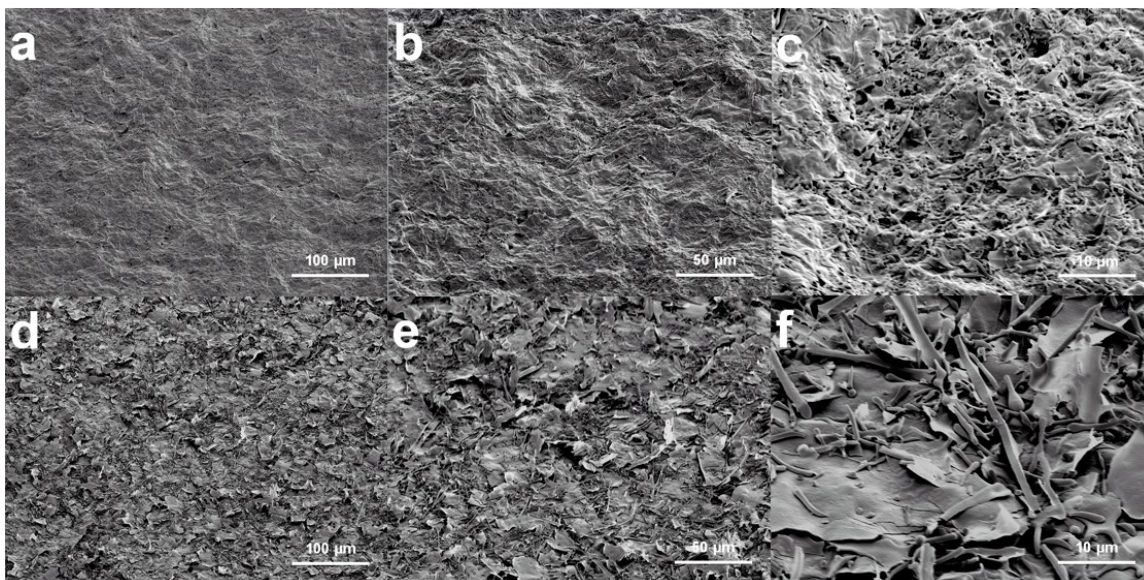

Figure S2. SEM images of film #2 (21 °C, vacuum): a-c. top surface; d-f. bottom surface.

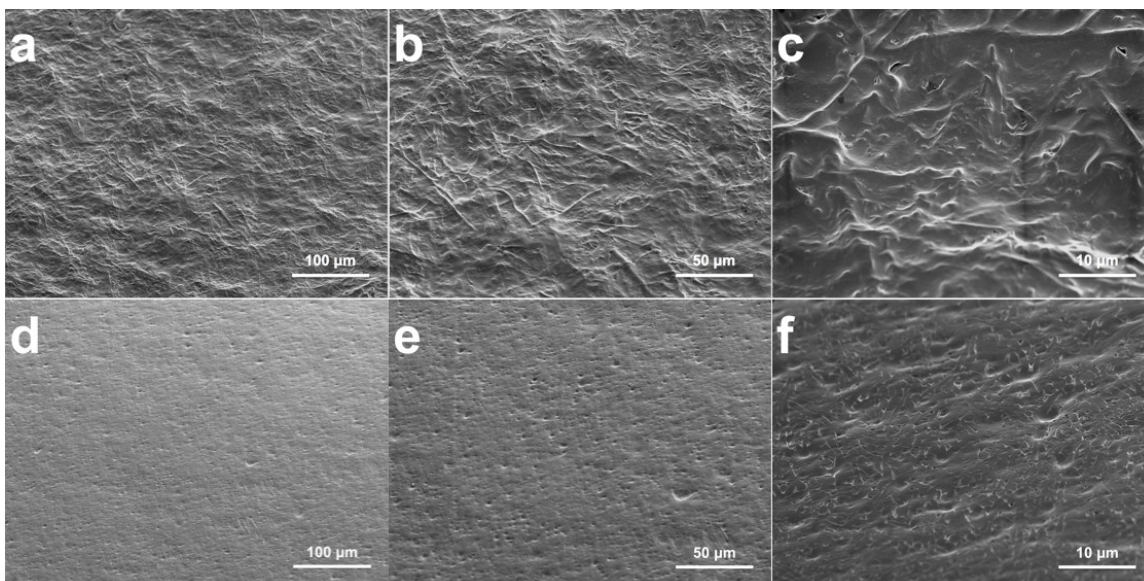

Figure S3. SEM images of film #3 (21 °C, vacuum, moisture): a-c. top surface; d-f. bottom surface.

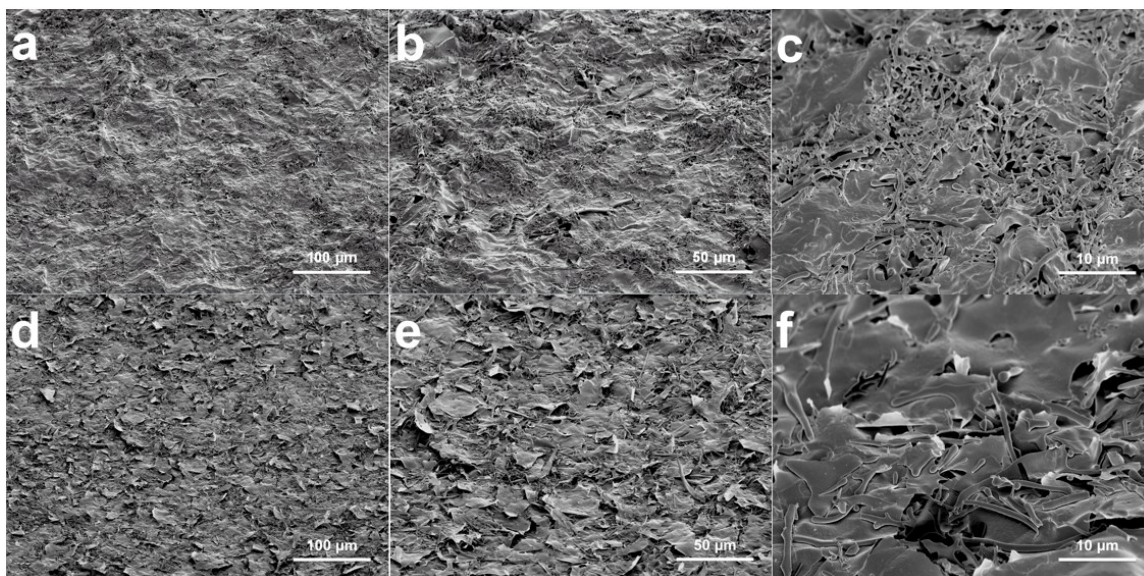

Figure S4. SEM images of film #4 (65 °C): a-c. top surface; d-f. bottom surface.

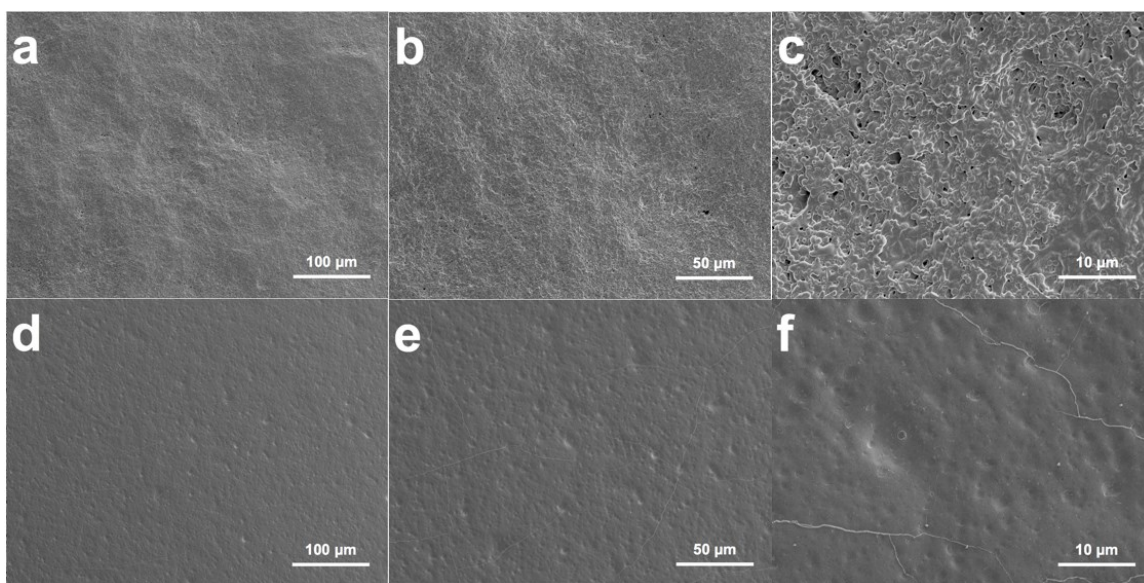

Figure S5. SEM images of film #5 (65 °C, vacuum, moisture): a-c. top surface; d-f. bottom surface.

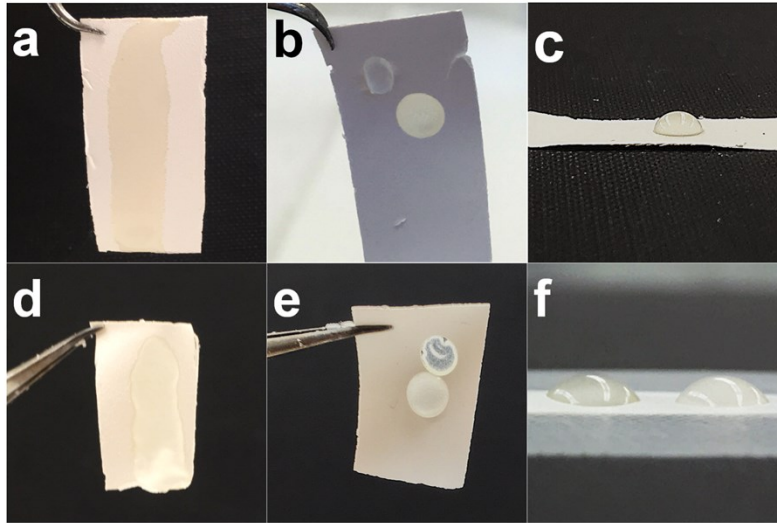

Figure S6. Water drops on top (a and d) and bottom (b-c and e-f) surfaces of film #2 (21 °C, vacuum, a-c) and #4 (65 °C, d-f) and: films were vertical in a-b and d-e and horizontal in c and f.

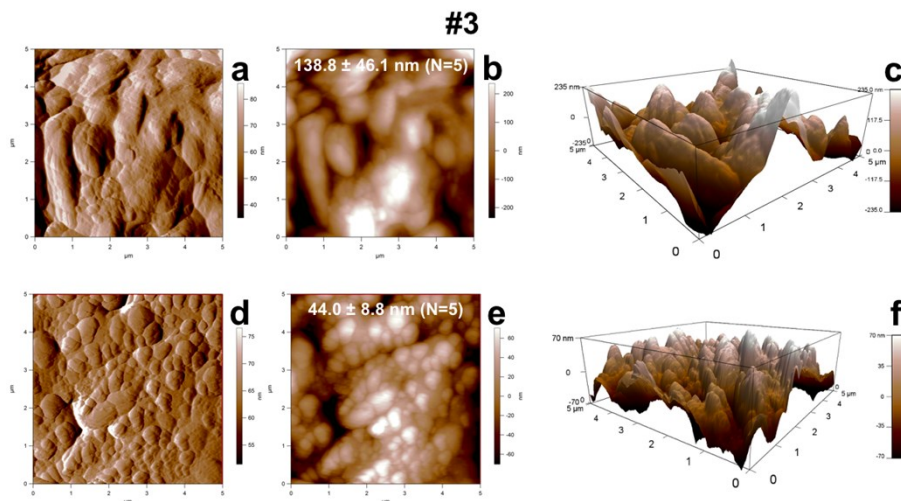

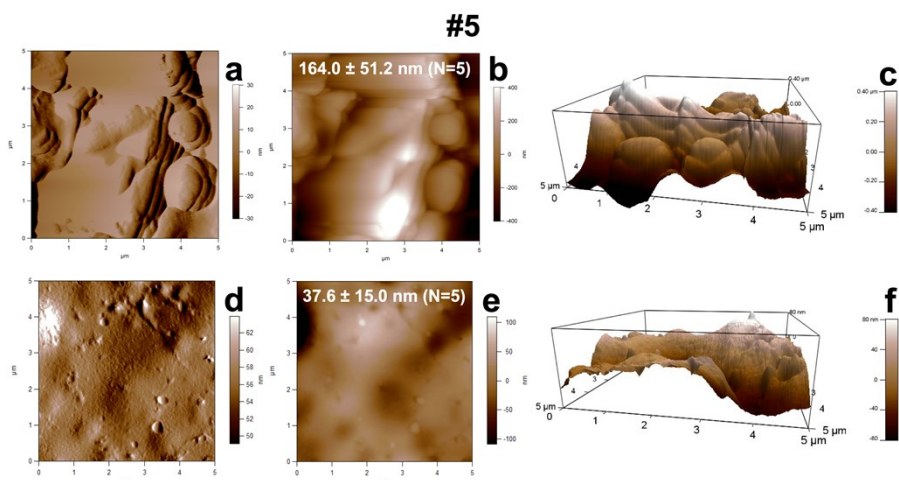

Figure S7. AFM amplitude (a, d), height (b, e) and 3D (c, f) images of the top (a-c) and bottom (d-f) surface of film #3 (21 °C, vacuum, moisture) and #5 (65 °C, vacuum, moisture).

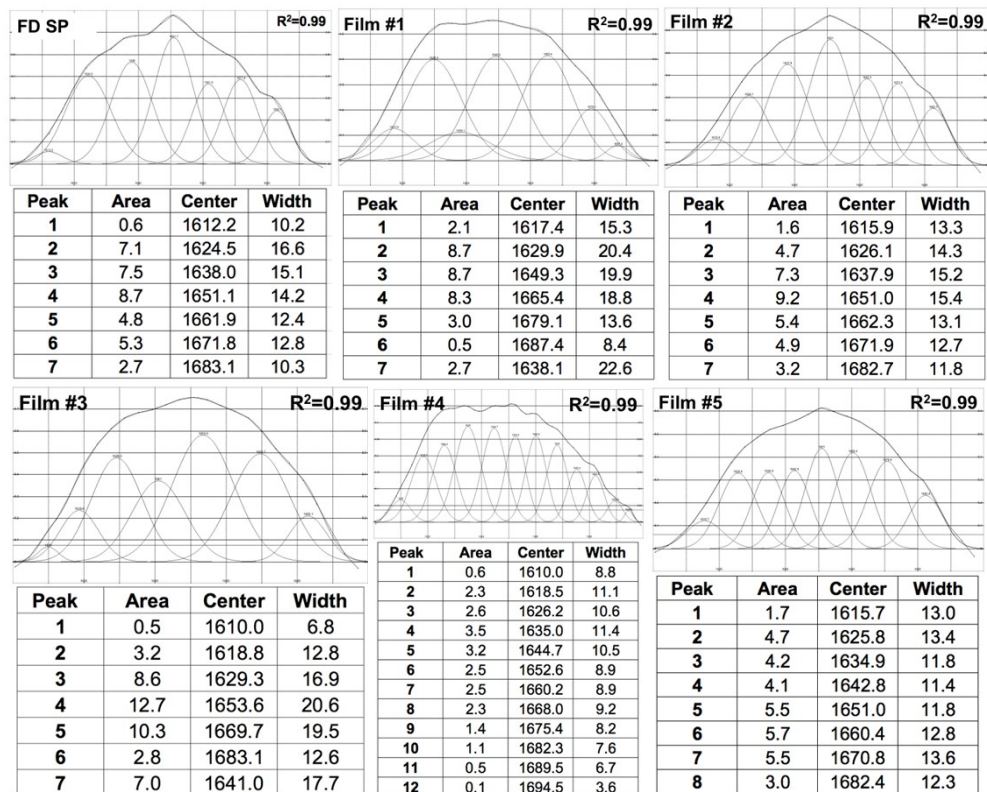

Figure S8. Curve-fitted amide I region (1600–1700  $\text{cm}^{-1}$ ) with secondary structure determination of FD SPs and films.

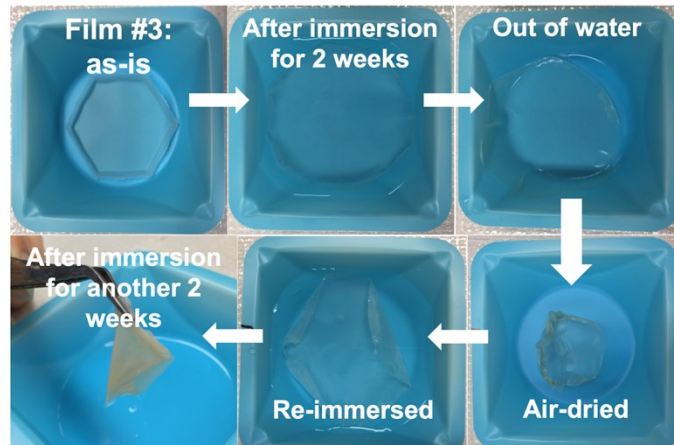

Figure S9. Film #3 was immersed in water for two weeks, air-dried and re-immersed in water for another two weeks.

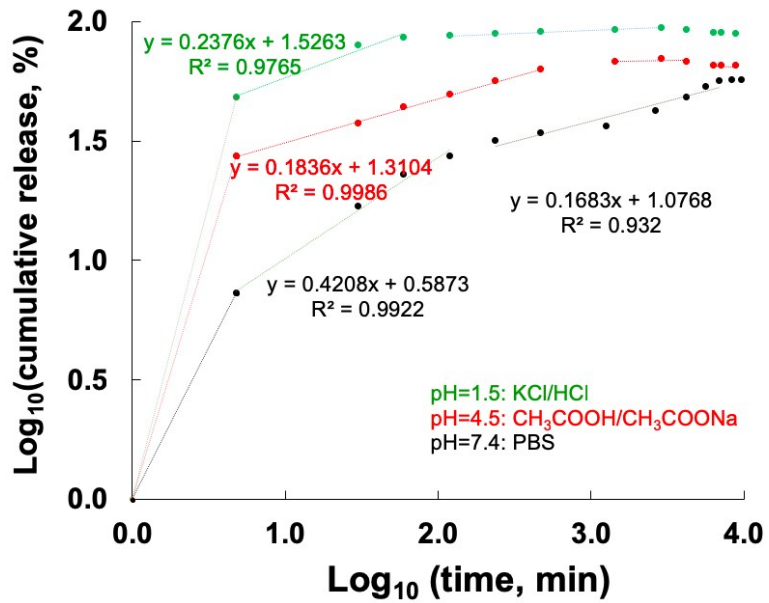

Figure S10. Korsmeyer-Peppas model fitting of MB release in three buffers.

Table S1. XRD parameters of SPs analyzed by peak fitting method

|                              |                                 |             |             |             |             |            |
|------------------------------|---------------------------------|-------------|-------------|-------------|-------------|------------|
| <b>FD SP</b><br>(CrI: 41.1%) | <b>2<math>\theta</math> (°)</b> | 9.0         | 17.1        | 19.4        | 22.3        | 25.2       |
|                              | <b>d<sub>hkl</sub> (Å)</b>      | 9.8         | 5.2         | 4.6         | 4.0         | 3.5        |
|                              | <b>Area (%)</b>                 | <b>10.8</b> | <b>4.2</b>  | <b>9.9</b>  | <b>8.4</b>  | <b>7.7</b> |
| <b>#1</b><br>(CrI: 53.6 %)   | <b>2<math>\theta</math> (°)</b> | 7.7         | 15.1        | 17.6        | 20.3        | 23.4       |
|                              | <b>d<sub>hkl</sub> (Å)</b>      | 11.5        | 5.9         | 5.0         | 4.4         | 3.8        |
|                              | <b>Area (%)</b>                 | <b>9.6</b>  | <b>7.1</b>  | <b>17.5</b> | <b>12.2</b> | <b>7.2</b> |
| <b>#2</b> (CrI:<br>49.8 %)   | <b>2<math>\theta</math> (°)</b> | 8.9         | 17.5        | 19.4        | 23.7        | 28.3       |
|                              | <b>d<sub>hkl</sub> (Å)</b>      | 9.9         | 5.1         | 4.6         | 3.8         | 3.2        |
|                              | <b>Area (%)</b>                 | <b>1.4</b>  | <b>18.1</b> | <b>16.2</b> | <b>8.0</b>  | <b>4.1</b> |
| <b>#3</b> (CrI:<br>52.3 %)   | <b>2<math>\theta</math> (°)</b> | 6.7         | 14.1        | 17.4        | 21.6        | 24.3       |
|                              | <b>d<sub>hkl</sub> (Å)</b>      | 13.2        | 6.3         | 5.1         | 4.1         | 3.7        |
|                              | <b>Area (%)</b>                 | <b>1.1</b>  | <b>18.1</b> | <b>17.3</b> | <b>7.5</b>  | <b>4.9</b> |
| <b>#4</b> (CrI:<br>55.6 %)   | <b>2<math>\theta</math> (°)</b> | 8.6         | 16.3        | 19.1        | 22.6        | 27.1       |
|                              | <b>d<sub>hkl</sub> (Å)</b>      | 10.3        | 5.4         | 4.6         | 3.9         | 3.3        |
|                              | <b>Area (%)</b>                 | <b>0.5</b>  | <b>13.3</b> | <b>15.6</b> | <b>14.4</b> | <b>8.9</b> |
| <b>#5</b><br>(CrI: 56.2 %)   | <b>2<math>\theta</math> (°)</b> | 8.8         | 16.6        | 19.6        | 23.5        | 28.1       |
|                              | <b>d<sub>hkl</sub> (Å)</b>      | 10.0        | 5.3         | 4.5         | 3.8         | 3.2        |
|                              | <b>Area (%)</b>                 | <b>1.5</b>  | <b>12.4</b> | <b>17.5</b> | <b>14.6</b> | <b>8.1</b> |

Table S2. Moisture content (%) of films under different conditions (N=3)

| Sample    | 150 °C, 0 % RH | 21 °C, 30-35 % RH | 21 °C, 65 % RH | 21 °C, 85-90 % RH |
|-----------|----------------|-------------------|----------------|-------------------|
| <b>#1</b> | -12.0 ± 1.4    | 0.0               | 4.9 ± 0.3      | 40.3 ± 1.1        |
| <b>#2</b> | -9.0 ± 1.1     | 0.0               | 1.2 ± 0.9      | 53.0 ± 1.7        |
| <b>#3</b> | -9.9 ± 0.9     | 0.0               | 6.8 ± 0.4      | 44.0 ± 1.0        |
| <b>#4</b> | -8.0 ± 0.3     | 0.0               | 2.9 ± 0.8      | 51.4 ± 5.4        |
| <b>#5</b> | -9.4 ± 0.6     | 0.0               | 4.1 ± 0.5      | 38.9 ± 1.3        |

Table S3. S<sub>p</sub> of film #3 and 5 (N=3)

| pH       | 5 min       |             | 1 week      |             | 2 weeks     |             |
|----------|-------------|-------------|-------------|-------------|-------------|-------------|
|          | #3          | #5          | #3          | #5          | #3          | #5          |
| <b>0</b> | 1.50 ± 0.07 | 1.29 ± 0.03 | 1.49 ± 0.05 | 1.27 ± 0.03 | 1.31 ± 0.01 | 1.34 ± 0.01 |
| <b>1</b> | 2.24 ± 0.05 | 2.24 ± 0.04 | 2.28 ± 0.04 | 2.40 ± 0.03 | 2.24 ± 0.01 | 2.23 ± 0.03 |

|           |             |             |             |             |             |             |
|-----------|-------------|-------------|-------------|-------------|-------------|-------------|
| <b>3</b>  | 1.17 ± 0.07 | 1.52 ± 0.01 | 1.27 ± 0.04 | 1.68 ± 0.03 | 1.17 ± 0.03 | 1.70 ± 0.01 |
| <b>7</b>  | 1.38 ± 0.12 | 1.55 ± 0.09 | 1.57 ± 0.01 | 1.46 ± 0.03 | 1.57 ± 0.02 | 1.41 ± 0.04 |
| <b>10</b> | 1.87 ± 0.12 | 1.59 ± 0.01 | 4.13 ± 0.18 | 1.57 ± 0.04 | 4.63 ± 0.09 | 1.74 ± 0.01 |

Table S4.  $S_p$  of SP/MB films in buffers at 37 °C (N=3)

| <b>pH</b>  | <b>5 min</b> | <b>30 min</b> | <b>1 h</b>  | <b>17 h</b> | <b>48 h</b> | <b>120 h</b> |
|------------|--------------|---------------|-------------|-------------|-------------|--------------|
| <b>7.4</b> | 1.23 ± 0.02  | 1.22 ± 0.03   | 1.16 ± 0.01 | 1.18 ± 0.04 | 1.19 ± 0.04 | 1.20 ± 0.04  |
| <b>4.5</b> | 1.18 ± 0.02  | 1.12 ± 0.05   | 1.14 ± 0.05 | 1.08 ± 0.00 | 1.08 ± 0.03 | 1.09 ± 0.06  |
| <b>1.5</b> | 1.38 ± 0.03  | 1.47 ± 0.04   | 1.47 ± 0.08 | 1.45 ± 0.04 | 1.49 ± 0.04 | 1.47 ± 0.05  |
